# Supplementary material for: Development and Validation of a UPLC-MS/MS Method to Monitor Cephapirin Excretion in Dairy Cows following Intramammary Infusion
Source: PLOS journal article supplement (doi:10.1371/journal.pone.0112343), 2014-11-06
Supplement: S5 (10.1371/journal.pone.0112343.s005) [file journal.pone.0112343.s005]

**Table S5: Daily urinary excretion of cephapirin in dairy cows following intramammary infusion of cephapirin<sup>1</sup>**

| Days, post-treatment | Daily cephapirin excretion in urine (mg) <sup>2</sup> | Standard error |
|----------------------|-------------------------------------------------------|----------------|
| 1                    | 2.69                                                  | 0.4            |
| 2                    | 0.19                                                  | 0.41           |
| 3                    | 0.19                                                  | 0.36           |
| 4                    | 0.08                                                  | 0.41           |
| 5                    | 0.17                                                  | 0.51           |

<sup>1</sup>Cows were administered with 300 mg cephapirin per quarter via intramammary route.

<sup>2</sup>Data is presented as least square means (n=3).
